# Supplementary material for: Climatic Refugia and Geographical Isolation Contribute to the Speciation and Genetic Divergence in Himalayan-Hengduan Tree Peonies (Paeonia delavayi and Paeonia ludlowii)
Source: PubMed Central journal article supplement (PMC7874331; doi:10.3389/fgene.2020.595334), 2021-01-27
Supplement: Data_Sheet_1.pdf [file Data_Sheet_1.pdf]

## Supplementary Material

Climatic refugia and geographical isolation contribute to the speciation and genetic divergence in  
Himalayan-Hengduan tree peonies (*Paeonia delavayi* and *Paeonia ludlowii*)

Yu-Juan Zhao, Gen-Shen Yin, Yue- Zhi Pan, Bo Tian, Xun Gong

Tables and Figures

**Table 1** | Collection localities, coordinates, sample size and recovered haplotypes based on chloroplast and nuclear data set from populations of *Paeonia delavayi* and *Paeonia ludlowii*.

| Code                    | Population      | Longitude<br>(E °) | Latitude<br>(N °) | Elevation<br>(m) | Sample size | cpDNA Haplotypes<br>(number of sequences) | Nuclear Haplotypes<br>(number of sequences) |
|-------------------------|-----------------|--------------------|-------------------|------------------|-------------|-------------------------------------------|---------------------------------------------|
| <i>Paeonia delavayi</i> |                 |                    |                   |                  |             |                                           |                                             |
| Yunnan Plateau          |                 |                    |                   |                  |             |                                           |                                             |
| Pd1                     | Kunming, Yunnan | 102.9              | 24.75             | 2350             | 10          | C5 (8), C6 (2)                            | A5 (17), A6 (3)                             |
| Pd2                     | Kunming, Yunnan | 102.62             | 24.95             | 1980             | 10          | C14 (10)                                  | A5 (20)                                     |
| Pd3                     | Kunming, Yunnan | 103.51             | 24.82             | 2100             | 10          | C29 (10)                                  | A31 (20)                                    |
| Hengduan Mountians      |                 |                    |                   |                  |             |                                           |                                             |
| Pd4                     | Dali, Yunnan    | 100.02             | 25.91             | 2570             | 10          | C13 (10)                                  | A4 (10), A15 (10)                           |
| Pd5                     | Eryuan, Yunnan  | 99.83              | 26.01             | 3415             | 10          | C10 (10)                                  | A10 (20)                                    |
| Pd6                     | Lijiang, Yunnan | 100.02             | 26.79             | 3210             | 10          | C16 (10)                                  | A3 (8), A21 (12)                            |
| Pd7                     | Lijiang, Yunnan | 100.21             | 27.01             | 3600             | 10          | C18 (10)                                  | A3 (8), A4 (6), A23 (2), A24 (4)            |
| Pd8                     | Lijiang, Yunnan | 100.25             | 27.05             | 3050             | 10          | C11 (10)                                  | A3 (10), A4 (6), A11 (4)                    |
| Pd9                     | Lijiang, Yunnan | 100.18             | 27.01             | 3300-3500        | 10          | C11 (10)                                  | A3 (4), A18 (3), A19 (9), A20 (4)           |
| Pd10                    | Lijiang, Yunnan | 100.26             | 27.2              | 2695             | 10          | C22 (10)                                  | A3 (17), A4 (2), A23 (1)                    |

|      |                     |        |       |      |    |                  |                                   |
|------|---------------------|--------|-------|------|----|------------------|-----------------------------------|
| Pd11 | Lijiang, Yunnan     | 99.97  | 27.33 | 2605 | 10 | C3 (8), C4 (2)   | A2 (12), A3 (4), A4 (4)           |
| Pd12 | Xianggelila, Yunnan | 99.95  | 27.4  | 2705 | 10 | C31 (10)         | A2 (10), A4 (10)                  |
| Pd13 | Xianggelila, Yunnan | 99.6   | 27.91 | 3296 | 10 | C24 (9), C25 (1) | A3 (2), A4 (6), A30 (12)          |
| Pd14 | Xianggelila, Yunnan | 100.01 | 27.6  | 2410 | 10 | C28 (10)         | A14(6), A24(14)                   |
| Pd15 | Xianggelila, Yunnan | 99.53  | 28.01 | 3160 | 10 | C24 (7), C26 (3) | A4(16), A23(4)                    |
| Pd16 | Xianggelila, Yunnan | 99.73  | 28.22 | 2950 | 10 | C12 (10)         | A12(10), A13(6), A14(4)           |
| Pd17 | Weixi, Yunnan       | 98.83  | 27.67 | 3695 | 10 | C15 (10)         | A4 (11), A16 (6), A17 (3)         |
| Pd18 | Weixi, Yunnan       | 99.01  | 27.7  | 3450 | 10 | C9 (10)          | A9 (10), A32 (10)                 |
| Pd19 | Weixi, Yunnan       | 99.01  | 27.86 | 2850 | 10 | C32 (10)         | A4 (4), A16 (6), A17 (4), A33 (6) |
| Pd20 | Deqin, Yunnan       | 99.17  | 28.17 | 2962 | 10 | C7 (6), C8 (4)   | A7 (14), A8 (6)                   |
| Pd21 | Deqin, Yunnan       | 98.82  | 28.46 | 2730 | 10 | C9 (10)          | A9 (20)                           |
| Pd22 | Deqin, Yunnan       | 98.81  | 28.43 | 3105 | 10 | C9 (10)          | A9 (20)                           |
| Pd23 | Lijiang, Yunnan     | 100.7  | 27.65 | 2685 | 10 | C23 (10)         | A24 (20)                          |
| Pd24 | Yanyuan, Sichuan    | 100.76 | 27.75 | 2750 | 10 | C33 (10)         | A4 (14), A34 (6)                  |
| Pd25 | Muli, Sichuan       | 100.8  | 28.01 | 3050 | 10 | C21 (10)         | A25 (20)                          |
| Pd26 | Muli, Sichuan       | 100.85 | 28.27 | 2590 | 10 | C19 (10)         | A25 (16), A26 (2), A27 (2)        |

|               |               |       |       |      |    |          |                   |
|---------------|---------------|-------|-------|------|----|----------|-------------------|
| Pd27          | Muli, Sichuan | 100.9 | 28.5  | 3480 | 10 | C20 (10) | A28 (12), A29 (8) |
| East Himalaya |               |       |       |      |    |          |                   |
| Pd28          | Chayu, Tibet  | 97.53 | 28.78 | 2800 | 10 | C2 (10)  | A1 (20)           |
| Pd29          | Chayu, Tibet  | 97.4  | 28.98 | 2850 | 10 | C1 (10)  | A1 (20)           |
| Pd30          | Chayu, Tibet  | 97.2  | 29.15 | 3400 | 7  | C2 (7)   | A1 (20)           |
| Pd31          | Bomi, Tibet   | 95.6  | 29.9  | 2906 | 10 | C2 (10)  | A1 (14)           |

---

*Paeonia ludlowii*

East Himalaya

|     |                 |       |       |      |    |                  |          |
|-----|-----------------|-------|-------|------|----|------------------|----------|
| Pl1 | Mainling, Tibet | 94.45 | 29.46 | 3100 | 8  | C17 (10)         | A22 (20) |
| Pl2 | Mainling, Tibet | 94.38 | 29.34 | 2975 | 10 | C30 (10)         | A22 (20) |
| Pl3 | Mainling, Tibet | 94.15 | 29.19 | 2970 | 10 | C17 (4), C27 (4) | A22 (16) |

---

**Table 2** | The chloroplast DNA fragment, nuclear gene information and list of the primers used in this study.

| fragment or locus          | PCR primers                                                           | Reference               |
|----------------------------|-----------------------------------------------------------------------|-------------------------|
| <i>trnL-trnF</i>           | F: CGA AAT CGG TAG ACG CTA CG<br>R: ATT TGA ACT GGT GAC ACG AG        | (Taberlet et al., 1991) |
| <i>rps16-trnK</i>          | F: AAA GTG GGT TTT TAT GAT CC<br>R: TTA AAA GCC GAG TAC TCT ACC       | (Shaw et al., 2007)     |
| <i>trnH-psbA</i>           | F: CGC GCA TGG TGG ATT CAC AAA TC<br>R: TGC ATG GTT CCT TGG TAA CTT C | (Dong et al., 2012)     |
| ATP-dependent Lon protease | F: TAA CTT CGA GCG TTG TCT<br>R: CTG CTG GTG CTG TAC CTA AA           | (Zhou et al., 2014)     |



|     |   |   |                |   |   |   |   |   |                |   |   |   |   |   |   |   |                |   |   |   |   |   |   |   |   |   |                |                |                |                |                |                |   |
|-----|---|---|----------------|---|---|---|---|---|----------------|---|---|---|---|---|---|---|----------------|---|---|---|---|---|---|---|---|---|----------------|----------------|----------------|----------------|----------------|----------------|---|
| C11 | . | . | 1 <sup>a</sup> | . | . | . | . | C | 1 <sup>b</sup> | . | G | . | . | . | . | . | 1 <sup>c</sup> | . | . | . | . | . | . | C | T | . | 1 <sup>d</sup> | .              | 1 <sup>e</sup> | 1 <sup>f</sup> | 1 <sup>g</sup> | .              |   |
| C12 | . | . | 1 <sup>a</sup> | . | . | . | . | . | 0              | . | G | . | . | . | . | . | 1 <sup>c</sup> | . | . | G | . | . | C | . | T | . | 1 <sup>d</sup> | .              | 1 <sup>e</sup> | 1 <sup>f</sup> | 1 <sup>g</sup> | G              |   |
| C13 | . | . | 1 <sup>a</sup> | . | T | . | . | . | 0              | . | G | . | . | . | . | C | 1 <sup>c</sup> | . | . | . | . | . | C | . | T | - | 0              | -              | 0              | 0              | 0              | -              |   |
| C14 | - | . | 1 <sup>a</sup> | . | . | . | . | . | 0              | T | G | . | . | . | . | . | 1 <sup>c</sup> | . | . | . | . | . | C | . | T | . | 1 <sup>d</sup> | .              | 1 <sup>e</sup> | 1 <sup>f</sup> | 1 <sup>g</sup> | G              |   |
| C15 | . | . | 1 <sup>a</sup> | . | T | . | . | . | 0              | . | G | A | . | . | . | . | 1 <sup>c</sup> | . | . | . | . | . | C | . | T | - | 0              | -              | 0              | 0              | 0              | -              |   |
| C16 | . | . | 1 <sup>a</sup> | . | . | . | . | . | 1 <sup>b</sup> | . | G | . | . | . | . | . | 1 <sup>c</sup> | . | . | . | . | . | . | C | T | . | 1 <sup>d</sup> | .              | 1 <sup>e</sup> | 1 <sup>f</sup> | 1 <sup>g</sup> | .              |   |
| C17 | . | . | 1 <sup>a</sup> | . | . | . | G | . | 1 <sup>b</sup> | . | G | . | . | A | . | . | 1 <sup>c</sup> | . | . | . | . | . | . | . | T | . | 1 <sup>d</sup> | .              | 1 <sup>e</sup> | 0              | 1 <sup>g</sup> | G              |   |
| C18 | . | . | 1 <sup>a</sup> | . | . | . | . | C | 1 <sup>b</sup> | . | G | . | . | . | . | . | 1 <sup>c</sup> | . | . | . | - | . | . | C | T | . | 1 <sup>d</sup> | .              | 1 <sup>e</sup> | 1 <sup>f</sup> | 1 <sup>g</sup> | .              |   |
| C19 | . | . | 1 <sup>a</sup> | . | . | . | . | . | 0              | . | G | . | . | . | . | . | 1 <sup>c</sup> | G | . | . | . | . | C | . | . | . | 1 <sup>d</sup> | C              | 1 <sup>e</sup> | 1 <sup>f</sup> | 1 <sup>g</sup> | G              |   |
| C20 | . | . | 1 <sup>a</sup> | . | . | . | . | . | 0              | . | G | . | . | . | . | . | 1 <sup>c</sup> | G | . | . | . | . | C | . | T | . | 1 <sup>d</sup> | .              | 1 <sup>e</sup> | 1 <sup>f</sup> | 1 <sup>g</sup> | G              |   |
| C21 | . | . | 1 <sup>a</sup> | . | . | . | . | . | 0              | . | G | . | . | . | . | . | 1 <sup>c</sup> | G | . | . | . | . | C | . | T | . | 1 <sup>d</sup> | .              | 1 <sup>e</sup> | 1 <sup>f</sup> | 1 <sup>g</sup> | G              |   |
| C22 | . | . | 1 <sup>a</sup> | . | . | G | . | . | 1 <sup>b</sup> | . | G | . | . | . | . | . | 1 <sup>c</sup> | . | . | . | . | . | . | C | T | . | 1 <sup>d</sup> | .              | 1 <sup>e</sup> | 1 <sup>f</sup> | 1 <sup>g</sup> | .              |   |
| C23 | . | - | 1 <sup>a</sup> | . | . | . | . | . | 1 <sup>b</sup> | . | G | . | A | . | T | . | 0              | . | . | . | . | . | . | . | T | . | 1 <sup>d</sup> | .              | 1 <sup>e</sup> | 1 <sup>f</sup> | 1 <sup>g</sup> | G              |   |
| C24 | . | . | 0              | . | . | . | . | . | 0              | . | G | . | . | . | . | . | 1 <sup>c</sup> | . | . | . | . | . | C | . | T | . | 1 <sup>d</sup> | .              | 1 <sup>e</sup> | 1 <sup>f</sup> | 1 <sup>g</sup> | G              |   |
| C25 | . | . | 0              | . | . | . | . | . | 0              | . | G | . | . | . | . | . | 1 <sup>c</sup> | . | . | . | . | . | C | . | T | . | 1 <sup>d</sup> | .              | 1 <sup>e</sup> | 1 <sup>f</sup> | 1 <sup>g</sup> | G              |   |
| C26 | . | . | 1 <sup>a</sup> | . | . | . | . | . | 0              | . | G | . | . | . | . | . | 1 <sup>c</sup> | . | . | . | . | . | . | C | . | T | .              | 1 <sup>d</sup> | .              | 1 <sup>e</sup> | 1 <sup>f</sup> | 1 <sup>g</sup> | G |

|     |   |   |                |   |   |   |   |   |                |   |   |   |   |   |   |   |                |   |   |   |   |   |   |   |   |                |                |                |                |                |                |   |
|-----|---|---|----------------|---|---|---|---|---|----------------|---|---|---|---|---|---|---|----------------|---|---|---|---|---|---|---|---|----------------|----------------|----------------|----------------|----------------|----------------|---|
| C27 | . | . | 1 <sup>a</sup> | . | . | G | . | . | 0              | . | G | . | . | A | . | . | 1 <sup>c</sup> | . | . | . | . | . | C | . | T | .              | 1 <sup>d</sup> | .              | 1 <sup>e</sup> | 0              | 1 <sup>g</sup> | G |
| C28 | . | . | 1 <sup>a</sup> | C | . | . | . | . | 1 <sup>b</sup> | . | G | . | . | . | . | . | 1 <sup>c</sup> | . | . | . | . | . | C | T | . | 1 <sup>d</sup> | .              | 1 <sup>e</sup> | 1 <sup>f</sup> | 1 <sup>g</sup> | .              |   |
| C29 | - | . | 1 <sup>a</sup> | . | . | . | . | . | 0              | T | G | . | . | . | . | . | 1 <sup>c</sup> | . | . | G | . | T | C | . | T | .              | 1 <sup>d</sup> | .              | 1 <sup>e</sup> | 1 <sup>f</sup> | 1 <sup>g</sup> | G |
| C30 | . | . | 1 <sup>a</sup> | . | . | G | . | . | 0              | . | G | . | . | A | . | . | 1 <sup>c</sup> | . | . | . | . | . | C | . | T | .              | 1 <sup>d</sup> | .              | 1 <sup>e</sup> | 0              | 1 <sup>g</sup> | G |
| C31 | . | . | 1 <sup>a</sup> | . | . | . | . | . | 1 <sup>b</sup> | . | G | . | . | . | . | . | 1 <sup>c</sup> | . | . | . | . | . | C | T | . | 1 <sup>d</sup> | .              | 1 <sup>e</sup> | 1 <sup>f</sup> | 1 <sup>g</sup> | .              |   |
| C32 | . | . | 1 <sup>a</sup> | . | . | . | . | . | 0              | . | G | . | . | . | . | . | 1 <sup>c</sup> | . | . | . | - | . | C | . | T | -              | 0              | -              | 0              | 0              | 0              | - |
| C33 | . | - | 1 <sup>a</sup> | . | . | . | . | . | 1 <sup>b</sup> | . | G | . | A | . | T | . | 0              | . | . | . | . | . | . | . | T | .              | 1 <sup>d</sup> | .              | 1 <sup>e</sup> | 1 <sup>f</sup> | 1 <sup>g</sup> | G |

---



Continued

| Haplotypes | Nucleotide position |   |                |   |                |   |   |   |                |   |   |   |   |   |   |   |   |                |   |   |   |   |   |   |   |                |                |                |                |   |
|------------|---------------------|---|----------------|---|----------------|---|---|---|----------------|---|---|---|---|---|---|---|---|----------------|---|---|---|---|---|---|---|----------------|----------------|----------------|----------------|---|
|            | 1                   | 1 | 1              | 1 | 1              | 1 | 1 | 1 | 1              | 1 | 1 | 1 | 1 | 1 | 1 | 1 | 1 | 1              | 1 | 1 | 1 | 1 | 1 | 2 | 2 | 2              | 2              | 2              | 2              |   |
|            | 2                   | 2 | 2              | 3 | 3              | 3 | 3 | 4 | 4              | 5 | 5 | 5 | 6 | 6 | 6 | 7 | 7 | 7              | 8 | 8 | 9 | 9 | 9 | 9 | 0 | 0              | 0              | 0              | 0              | 4 |
|            | 3                   | 6 | 6              | 1 | 1              | 2 | 4 | 5 | 7              | 2 | 4 | 9 | 3 | 5 | 6 | 1 | 2 | 5              | 2 | 3 | 1 | 5 | 9 | 9 | 0 | 1              | 1              | 3              | 4              | 0 |
|            | 3                   | 2 | 3              | 6 | 7              | 2 | 3 | 9 | 9              | 5 | 6 | 2 | 4 | 4 | 9 | 0 | 5 | 0              | 3 | 8 | 1 | 1 | 6 | 7 | 1 | 0              | 1              | 7              | 7              | 3 |
| C1         | 1 <sup>h</sup>      | T | 1 <sup>i</sup> | A | 1 <sup>j</sup> | A | C | A | 0              | A | A | T | T | G | T | G | T | G              | 0 | G | 0 | A | - | T | T | G              | 1 <sup>n</sup> | G              | 2 <sup>a</sup> | G |
| C2         | 1 <sup>h</sup>      | . | 1 <sup>i</sup> | . | 1 <sup>j</sup> | . | . | 0 | .              | . | . | . | . | . | - | . | . | 0              | . | 0 | . | - | . | . | G | 1 <sup>n</sup> | .              | 2 <sup>a</sup> | .              |   |
| C3         | 1 <sup>h</sup>      | . | 1 <sup>i</sup> | . | 1 <sup>j</sup> | . | . | 0 | .              | . | . | . | . | A | - | . | T | 1 <sup>l</sup> | . | 0 | . | - | . | . | G | 1 <sup>n</sup> | .              | 2 <sup>a</sup> | .              |   |
| C4         | 1 <sup>h</sup>      | . | 1 <sup>i</sup> | . | 1 <sup>j</sup> | . | . | 0 | .              | . | . | . | . | . | - | . | T | 1 <sup>l</sup> | . | 0 | . | - | . | . | G | 1 <sup>n</sup> | .              | 2 <sup>a</sup> | .              |   |
| C5         | 1 <sup>h</sup>      | . | 1 <sup>i</sup> | . | 1 <sup>j</sup> | G | . | C | 1 <sup>k</sup> | . | . | . | . | . | . | - | . | .              | 0 | T | 0 | . | A | . | . | G              | 1 <sup>n</sup> | .              | 2 <sup>b</sup> | . |
| C6         | 1 <sup>h</sup>      | . | 1 <sup>i</sup> | . | 1 <sup>j</sup> | G | . | C | 1 <sup>k</sup> | . | . | . | . | . | A | - | . | .              | 0 | T | 0 | . | A | . | . | G              | 1 <sup>n</sup> | .              | 2 <sup>b</sup> | . |
| C7         | 1 <sup>h</sup>      | . | 1 <sup>i</sup> | . | 1 <sup>j</sup> | . | . | 0 | .              | . | . | . | . | . | - | . | . | 0              | . | 0 | . | - | . | . | G | 1 <sup>n</sup> | .              | 2 <sup>a</sup> | .              |   |
| C8         | 1 <sup>h</sup>      | G | 1 <sup>i</sup> | . | 1 <sup>j</sup> | . | . | 0 | .              | . | . | . | . | . | - | . | . | 0              | . | 0 | . | - | . | . | G | 1 <sup>n</sup> | .              | 2 <sup>a</sup> | .              |   |
| C9         | 1 <sup>h</sup>      | . | 1 <sup>i</sup> | . | 1 <sup>j</sup> | . | . | 0 | .              | . | . | . | . | . | - | . | . | 0              | . | 0 | . | - | . | . | G | 1 <sup>n</sup> | .              | 2 <sup>a</sup> | .              |   |
| C10        | 1 <sup>h</sup>      | . | 1 <sup>i</sup> | T | 1 <sup>j</sup> | . | . | 0 | .              | T | . | . | . | . | - | . | T | 0              | . | 0 | . | - | . | . | G | 1 <sup>n</sup> | .              | 2 <sup>a</sup> | .              |   |

|     |                |   |                |   |                |   |   |   |                |   |   |   |   |   |   |   |   |   |   |   |   |   |   |   |                |                |                |                |                |   |
|-----|----------------|---|----------------|---|----------------|---|---|---|----------------|---|---|---|---|---|---|---|---|---|---|---|---|---|---|---|----------------|----------------|----------------|----------------|----------------|---|
| C11 | 1 <sup>h</sup> | . | 1 <sup>i</sup> | . | 1 <sup>j</sup> | . | . | 0 | .              | . | . | . | . | . | - | . | T | 0 | . | 0 | . | . | . | G | 1 <sup>n</sup> | .              | 2 <sup>a</sup> | .              |                |   |
| C12 | 1 <sup>h</sup> | . | 1 <sup>i</sup> | . | 1 <sup>j</sup> | G | . | C | 1 <sup>k</sup> | G | . | . | . | . | . | - | . | T | 0 | T | 0 | . | . | . | G              | 1 <sup>n</sup> | .              | 2 <sup>a</sup> | .              |   |
| C13 | 0              | . | 0              | 0 | 0              | G | . | C | 1 <sup>k</sup> | . | . | . | . | . | . | - | . | . | 0 | T | 0 | . | . | . | G              | 1 <sup>n</sup> | .              | 2 <sup>a</sup> | .              |   |
| C14 | 1 <sup>h</sup> | . | 1 <sup>i</sup> | . | 1 <sup>j</sup> | G | . | C | 1 <sup>k</sup> | . | . | . | . | . | . | - | . | . | 0 | T | 0 | . | A | . | .              | G              | 1 <sup>n</sup> | .              | 2 <sup>a</sup> | . |
| C15 | 0              | . | 0              | 0 | 0              | G | . | C | 1 <sup>k</sup> | . | . | . | . | . | . | - | . | . | 0 | T | 0 | . | . | . | G              | 1 <sup>n</sup> | .              | 2 <sup>a</sup> | .              |   |
| C16 | 1 <sup>h</sup> | . | 1 <sup>i</sup> | . | 1 <sup>j</sup> | . | . | 0 | .              | . | . | . | . | . | . | - | . | T | 0 | . | 0 | . | . | . | G              | 1 <sup>n</sup> | .              | 2 <sup>b</sup> | .              |   |
| C17 | 1 <sup>h</sup> | . | 1 <sup>i</sup> | . | 1 <sup>j</sup> | G | . | C | 1 <sup>k</sup> | . | . | . | . | . | . | - | . | . | 0 | T | 0 | . | . | . | T              | 1 <sup>n</sup> | .              | 2 <sup>a</sup> | .              |   |
| C18 | 1 <sup>h</sup> | . | 1 <sup>i</sup> | . | 1 <sup>j</sup> | . | . | 0 | .              | . | . | . | . | . | . | - | . | T | 0 | . | 0 | . | . | . | G              | 1 <sup>n</sup> | .              | 2 <sup>a</sup> | .              |   |
| C19 | 1 <sup>h</sup> | . | 1 <sup>i</sup> | . | 1 <sup>j</sup> | G | . | C | 1 <sup>k</sup> | . | . | G | . | . | . | - | . | T | 0 | T | 0 | . | . | . | -              | 0              | .              | 2 <sup>a</sup> | .              |   |
| C20 | 1 <sup>h</sup> | . | 1 <sup>i</sup> | . | 1 <sup>j</sup> | G | . | C | 1 <sup>k</sup> | . | . | G | . | . | . | - | . | T | 0 | T | 0 | . | . | . | -              | 0              | .              | 2 <sup>a</sup> | .              |   |
| C21 | 1 <sup>h</sup> | . | 1 <sup>i</sup> | . | 1 <sup>j</sup> | G | . | C | 1 <sup>k</sup> | . | . | G | . | . | . | - | . | . | 0 | T | 0 | . | . | . | -              | 0              | .              | 2 <sup>a</sup> | .              |   |
| C22 | 1 <sup>h</sup> | . | 1 <sup>i</sup> | . | 1 <sup>j</sup> | . | . | 0 | .              | . | . | . | . | . | . | - | . | T | 0 | . | 0 | . | . | . | G              | 1 <sup>n</sup> | .              | 2 <sup>a</sup> | .              |   |
| C23 | 1 <sup>h</sup> | . | 1 <sup>i</sup> | . | 1 <sup>j</sup> | . | . | 0 | .              | . | . | . | A | . | . | - | . | T | 0 | T | 0 | . | . | . | G              | 1 <sup>n</sup> | .              | 2 <sup>a</sup> | A              |   |
| C24 | 1 <sup>h</sup> | . | 1 <sup>i</sup> | . | 1 <sup>j</sup> | G | . | C | 1 <sup>k</sup> | G | . | . | G | . | . | - | . | T | 0 | T | 0 | . | . | . | T              | 1 <sup>n</sup> | A              | 2 <sup>a</sup> | .              |   |
| C25 | 1 <sup>h</sup> | . | 1 <sup>i</sup> | . | 1 <sup>j</sup> | G | . | C | 1 <sup>k</sup> | G | . | . | G | . | . | - | . | T | 0 | . | 0 | . | . | . | G              | 1 <sup>n</sup> | A              | 2 <sup>a</sup> | .              |   |
| C26 | 1 <sup>h</sup> | . | 1 <sup>i</sup> | . | 1 <sup>j</sup> | G | . | C | 1 <sup>k</sup> | G | . | . | G | . | . | - | . | T | 0 | T | 0 | . | . | . | T              | 1 <sup>n</sup> | A              | 2 <sup>a</sup> | .              |   |

|     |                |   |                |   |                |   |   |   |                |   |   |   |   |   |   |   |   |   |   |                |   |   |   |   |   |                |                |                |                |   |
|-----|----------------|---|----------------|---|----------------|---|---|---|----------------|---|---|---|---|---|---|---|---|---|---|----------------|---|---|---|---|---|----------------|----------------|----------------|----------------|---|
| C27 | 1 <sup>h</sup> | . | 1 <sup>i</sup> | . | 1 <sup>j</sup> | G | . | C | 1 <sup>k</sup> | . | . | . | . | . | . | - | . | . | 0 | .              | 0 | . | - | . | . | G              | 1 <sup>n</sup> | .              | 2 <sup>a</sup> | . |
| C28 | 1 <sup>h</sup> | . | 1 <sup>i</sup> | . | 1 <sup>j</sup> | . | . | . | 0              | . | . | . | . | . | . | - | . | . | 0 | .              | 0 | . | - | . | . | G              | 1 <sup>n</sup> | .              | 2 <sup>a</sup> | . |
| C29 | 1 <sup>h</sup> | . | 1 <sup>i</sup> | . | 1 <sup>j</sup> | G | . | C | 1 <sup>k</sup> | . | . | . | . | . | . | - | . | . | 0 | T              | 0 | . | A | . | . | G              | 1 <sup>n</sup> | .              | 2 <sup>a</sup> | . |
| C30 | 1 <sup>h</sup> | . | 1 <sup>i</sup> | . | 1 <sup>j</sup> | G | . | C | 1 <sup>k</sup> | . | . | . | . | . | G | A | . | 0 | T | 0              | . | - | . | - | T | 1 <sup>n</sup> | .              | 2 <sup>a</sup> | .              |   |
| C31 | 1 <sup>h</sup> | . | 1 <sup>i</sup> | . | 1 <sup>j</sup> | . | 0 | . | 0              | . | . | . | A | . | - | . | T | 0 | . | 0              | . | - | C | . | G | 1 <sup>n</sup> | .              | 2 <sup>b</sup> | .              |   |
| C32 | 0              | . | 0              | 0 | 0              | G | . | . | 0              | . | . | . | . | . | - | . | . | 0 | . | 0              | G | - | . | . | T | 1 <sup>n</sup> | .              | 2 <sup>a</sup> | .              |   |
| C33 | 1 <sup>h</sup> | . | 1 <sup>i</sup> | . | 1 <sup>j</sup> | . | . | . | 0              | . | . | . | A | . | - | . | T | 0 | T | 1 <sup>m</sup> | . | - | . | . | G | 1 <sup>n</sup> | .              | 2 <sup>a</sup> | .              |   |

1<sup>a</sup>: AAAAT

1<sup>b</sup>: GTATGGAATG

1<sup>c</sup>: TTTCGAT

1<sup>d</sup>: GATT

1<sup>e</sup>:TA

1<sup>f</sup>: AGATTATA

1<sup>g</sup>: GATATAAAAATCCCGCGTTCTAGAATAGAACG

1<sup>h</sup>: CAAAAATCTATTTTATCTTATTGATTTTT

1<sup>i</sup>: GATATAAATCGAAAAAATCAAGTGAATGGGAATAAATGACAAAATTGGATTT

1<sup>i</sup>: AAAAT

1<sup>k</sup>: TATT

1<sup>l</sup>: TA

1<sup>m</sup>: AACCAAA

1<sup>p</sup>: AAT

2<sup>a</sup>: CCCCTTGATAGAACAAGGAA

2<sup>b</sup>: TTCCTTGTTCTATCAAGGGG



Continued

| Haplotypes | Nucleotide position |   |   |   |   |   |   |   |   |   |   |   |   |   |   |   |   |   |   |   |   |
|------------|---------------------|---|---|---|---|---|---|---|---|---|---|---|---|---|---|---|---|---|---|---|---|
|            | 2                   | 2 | 2 | 2 | 3 | 3 | 3 | 3 | 3 | 4 | 4 | 4 | 4 | 4 | 5 | 5 | 5 | 5 | 5 | 5 |   |
|            | 7                   | 7 | 9 | 9 | 0 | 1 | 3 | 4 | 9 | 3 | 9 | 9 | 9 | 9 | 0 | 0 | 0 | 1 | 1 | 3 | 4 |
|            | 7                   | 8 | 1 | 3 | 4 | 8 | 5 | 8 | 8 | 4 | 2 | 3 | 5 | 7 | 0 | 8 | 9 | 2 | 7 | 3 | 3 |
| A1         | G                   | T | T | A | G | G | T | A | C | C | C | G | T | T | C | C | G | C | C | T | T |
| A2         | .                   | . | . | . | . | . | . | . | . | . | . | . | . | . | . | . | A | A | . | . | . |
| A3         | .                   | . | . | . | . | . | . | . | . | . | . | . | . | . | T | . | . | A | . | . | . |
| A4         | .                   | . | . | . | . | . | . | . | . | . | . | . | . | . | . | . | . | A | . | . | . |
| A5         | A                   | . | . | . | . | . | . | . | . | . | . | . | . | . | . | . | . | A | . | . | . |
| A6         | A                   | . | . | . | . | . | . | . | . | . | . | . | . | . | . | . | . | A | . | . | . |
| A7         | C                   | A | . | . | . | . | C | . | . | . | . | . | . | . | . | . | . | A | . | C | . |
| A8         | .                   | A | . | . | . | . | C | . | . | . | . | . | . | . | . | . | . | A | . | C | . |
| A9         | .                   | . | . | . | . | . | . | . | . | . | . | . | . | . | . | . | . | A | . | . | . |
| A10        | .                   | . | . | . | . | A | . | . | . | . | . | . | . | . | . | . | . | A | . | . | . |
| A11        | .                   | . | . | . | . | . | . | . | T | . | . | A | . | . | . | . | . | A | . | C | . |
| A12        | C                   | A | . | . | . | . | . | T | T | . | . | A | . | . | . | . | . | A | . | C | . |
| A13        | C                   | A | . | . | . | . | C | T | . | . | . | . | C | . | . | . | . | A | . | C | . |
| A14        | C                   | A | . | . | . | . | . | . | T | . | . | A | . | . | . | . | . | A | . | C | . |
| A15        | .                   | . | . | . | . | . | . | . | . | . | . | . | . | A | . | . | . | A | . | . | . |
| A16        | .                   | . | . | . | . | . | . | . | . | . | . | . | . | . | . | . | . | A | T | C | . |
| A17        | .                   | . | . | . | . | . | . | . | . | . | . | . | . | . | . | . | . | A | . | . | . |
| A18        | .                   | . | . | . | . | . | . | . | . | . | . | . | . | . | T | . | . | A | . | . | . |
| A19        | .                   | . | . | . | . | . | . | . | . | . | . | . | . | . | T | . | . | A | . | . | . |
| A20        | .                   | . | . | . | . | . | . | . | T | . | . | A | . | . | T | . | . | A | . | . | . |
| A21        | .                   | . | . | . | . | . | . | . | . | . | . | . | . | . | T | . | . | A | . | . | . |
| A22        | C                   | A | C | . | . | . | . | . | . | . | . | . | . | . | . | T | . | A | . | C | C |
| A23        | .                   | . | . | . | . | . | . | . | . | . | . | . | . | . | T | . | . | A | . | . | . |
| A24        | C                   | A | . | . | . | . | . | . | T | . | . | A | . | . | . | . | . | A | . | C | . |
| A25        | C                   | A | . | . | . | . | . | . | . | . | T | . | . | . | . | . | . | A | . | C | . |
| A26        | C                   | A | . | . | . | . | . | . | . | . | . | . | . | . | . | . | . | A | . | C | . |
| A27        | C                   | A | . | . | . | . | . | . | . | . | . | . | . | . | . | . | . | A | . | C | . |
| A28        | C                   | A | . | . | . | . | . | . | . | . | . | A | . | . | . | . | . | A | . | C | . |
| A29        | C                   | A | . | . | . | . | . | . | . | . | . | . | . | . | . | . | . | A | . | C | . |
| A30        | .                   | . | . | T | . | . | . | . | . | . | . | . | . | . | . | . | . | A | . | . | . |
| A31        | A                   | . | . | . | . | . | . | . | . | . | . | . | . | . | . | . | . | A | . | . | . |
| A32        | .                   | . | . | . | . | . | . | . | . | . | . | . | . | . | . | . | . | A | T | C | . |
| A33        | .                   | . | . | . | . | . | . | . | . | . | . | . | . | . | . | . | . | A | . | C | . |
| A34        | .                   | . | . | . | C | . | . | . | . | . | . | . | . | . | . | . | . | A | . | . | . |

1<sup>st</sup>: TACTCGTATTATA

**Table 5** | Means, standard errors (SE) and results of Independent-Sample t-test on the 8 Bioclim factors of current periods for the HDM, EH and YP regions of *Paeonia delavayi* surveyed in this study.

| Independent-Sample t-test |          | Bio2         | Bio3         | Bio4     | Bio11        | Bio12    | Bio14        | Bio15        | Bio19    |
|---------------------------|----------|--------------|--------------|----------|--------------|----------|--------------|--------------|----------|
| HDM                       | Mean     | 11.9         | 47.0         | 513.74   | 2.62         | 893.41   | 5.11         | 100.03       | 22.14    |
|                           | SE       | 1.03         | 2.0          | 44.17    | 3.68         | 127.4    | 2.41         | 7.71         | 10.46    |
| EH                        | Mean     | 12.7         | 44.4         | 591.8    | -1.19        | 716      | 3.5          | 96.08        | 17.5     |
|                           | SE       | 0.64         | 0.25         | 26.33    | 2.60         | 155.96   | 1.58         | 4.01         | 7.33     |
| YP                        | Mean     | 10.5         | 46.30        | 457.22   | 7.05         | 1032     | 11.11        | 93.84        | 39.66    |
|                           | SE       | 0.28         | 0.61         | 11.36    | 2.48         | 37.77    | 2.472        | 3.97         | 4.47     |
| Comparison on (1-2)       |          |              |              |          |              |          |              |              |          |
| HDM-EH                    | <i>P</i> | <b>0.025</b> | <b>0</b>     | <b>0</b> | <b>0.002</b> | <b>0</b> | <b>0.042</b> | <b>0.017</b> | 0.175    |
| HDM-YP                    | <i>P</i> | <b>0</b>     | <b>0.021</b> | <b>0</b> | <b>0.001</b> | <b>0</b> | <b>0</b>     | <b>0.001</b> | <b>0</b> |
| EH-YP                     | <i>P</i> | <b>0</b>     | <b>0</b>     | <b>0</b> | <b>0</b>     | <b>0</b> | <b>0</b>     | 0.239        | <b>0</b> |

Significant level:  $P < 0.05$ , significant values ( $P < 0.05$ ) are shown in bold. HDM: Hengduan Mountains; EH: East Himalaya; YP: Yunnan Plateau

**Table 6** | *trnL-F*, *rps16\_trnK*, *psbA-trnH* and ATP-dependent Lon protease gene haplotypes and Genbank accession numbers for *trnL-F*, *rps16\_trnK*, *psbA-trnH* and ATP-dependent Lon protease gene haplotypes for *Paeonia* subsect. *Delavayanae*.

| <i>trnL-F</i> |          | <i>rps16_trnK</i> |          | <i>psbA-trnH</i> |          | ATP-dependent Lon protease gene |          |
|---------------|----------|-------------------|----------|------------------|----------|---------------------------------|----------|
| haplotypes    | GenBank  | haplotypes        | GenBank  | haplotypes       | GenBank  | haplotypes                      | GenBank  |
| LF_1          | MT787349 | SK_1              | MT814344 | HA_1             | MT814327 | A1                              | MT814369 |
| LF_2          | MT787350 | SK_2              | MT814345 | HA_2             | MT814328 | A2                              | MT814370 |
| LF_3          | MT787351 | SK_3              | MT814346 | HA_3             | MT814329 | A3                              | MT814371 |
| LF_4          | MT787352 | SK_4              | MT814347 | HA_4             | MT814330 | A4                              | MT814372 |
| LF_5          | MT787353 | SK_5              | MT814348 | HA_5             | MT814331 | A5                              | MT814373 |
| LF_6          | MT787354 | SK_6              | MT814349 | HA_6             | MT814332 | A6                              | MT814374 |
| LF_7          | MT787355 | SK_7              | MT814350 | HA_7             | MT814333 | A7                              | MT814375 |
| LF_8          | MT787356 | SK_8              | MT814351 | HA_8             | MT814334 | A8                              | MT814376 |
| LF_10         | MT787357 | SK_9              | MT814352 | HA_9             | MT814335 | A9                              | MT814377 |
| LF_11         | MT787358 | SK_10             | MT814353 | HA_10            | MT814336 | A10                             | MT814378 |
| LF_12         | MT787359 | SK_11             | MT814354 | HA_11            | MT814337 | A11                             | MT814379 |
| LF_13         | MT787360 | SK_12             | MT814355 | HA_12            | MT814338 | A12                             | MT814380 |



|       |          |       |          |       |          |     |          |
|-------|----------|-------|----------|-------|----------|-----|----------|
| LF_14 | MT787361 | SK_13 | MT814356 | HA_13 | MT814339 | A13 | MT814381 |
| LF_15 | MT787362 | SK_14 | MT814357 | HA_14 | MT814340 | A14 | MT814382 |
| LF_16 | MT787363 | SK_15 | MT814358 | HA_15 | MT814341 | A15 | MT814383 |
| LF_17 | MT787364 | SK_16 | MT814359 | HA_16 | MT814342 | A16 | MT814384 |
| LF_18 | MT787365 | SK_17 | MT814360 | HA_17 | MT814343 | A17 | MT814385 |
| LF_9  | MT787366 | SK_18 | MT814361 |       |          | A18 | MT814386 |
|       |          | SK_19 | MT814362 |       |          | A19 | MT814387 |
|       |          | SK_20 | MT814363 |       |          | A20 | MT814388 |
|       |          | SK_21 | MT814364 |       |          | A21 | MT814389 |
|       |          | SK_22 | MT814365 |       |          | A22 | MT814390 |
|       |          | SK_23 | MT814366 |       |          | A23 | MT814391 |
|       |          | SK_24 | MT814367 |       |          | A24 | MT814392 |
|       |          | SK_25 | MT814368 |       |          | A25 | MT814393 |
|       |          |       |          |       |          | A26 | MT814394 |
|       |          |       |          |       |          | A27 | MT814395 |
|       |          |       |          |       |          | A28 | MT814396 |

|     |          |
|-----|----------|
| A29 | MT814397 |
| A30 | MT814398 |
| A31 | MT814399 |
| A32 | MT814400 |
| A33 | MT814401 |
| A34 | MT814402 |

---

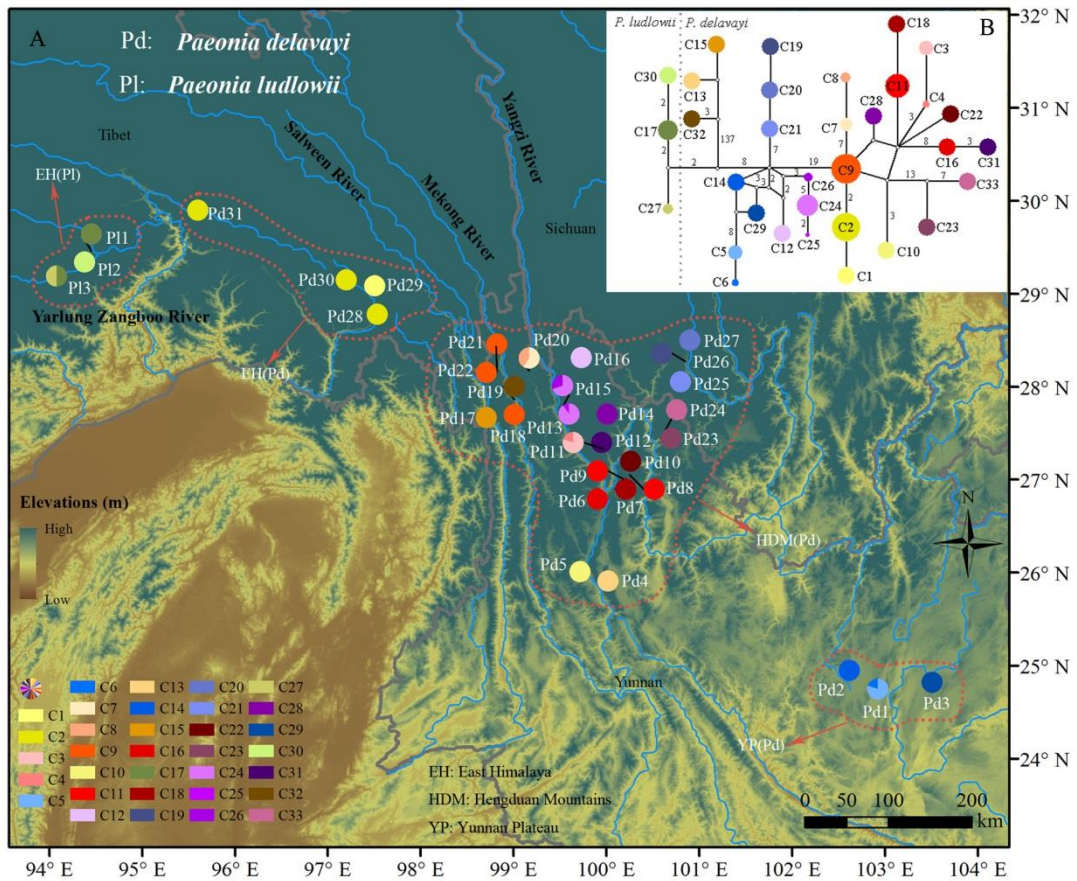

**FIGURE 1** | Geographic distribution of the cpDNA haplotypes (A) and the median-joining network of 33 cpDNA haplotypes (B) detected from 35 *Paeonia* subsect. *Delavayanae* populations in this study. Pie charts division corresponds to the frequency of haplotype per sampling site. Colored dotted line delineates the population division representing significantly genetic divergence. The sizes of circles are approximately proportional to sample size. Numbers on branches indicate the number of mutations when branches represent more than one mutation.

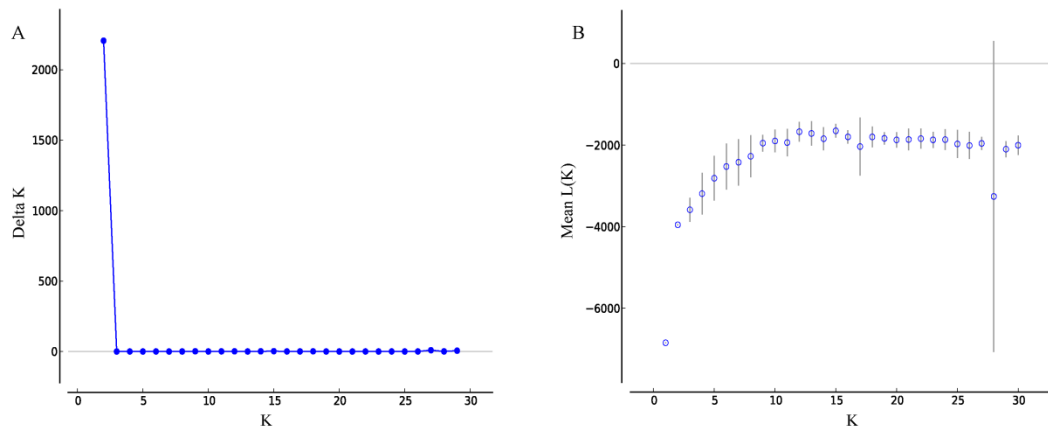

**FIGURE 2** | The distribution of Delta K (A) and the mean posterior probability (L(K)) of the data for K =1-30 (10 replicates) (B).

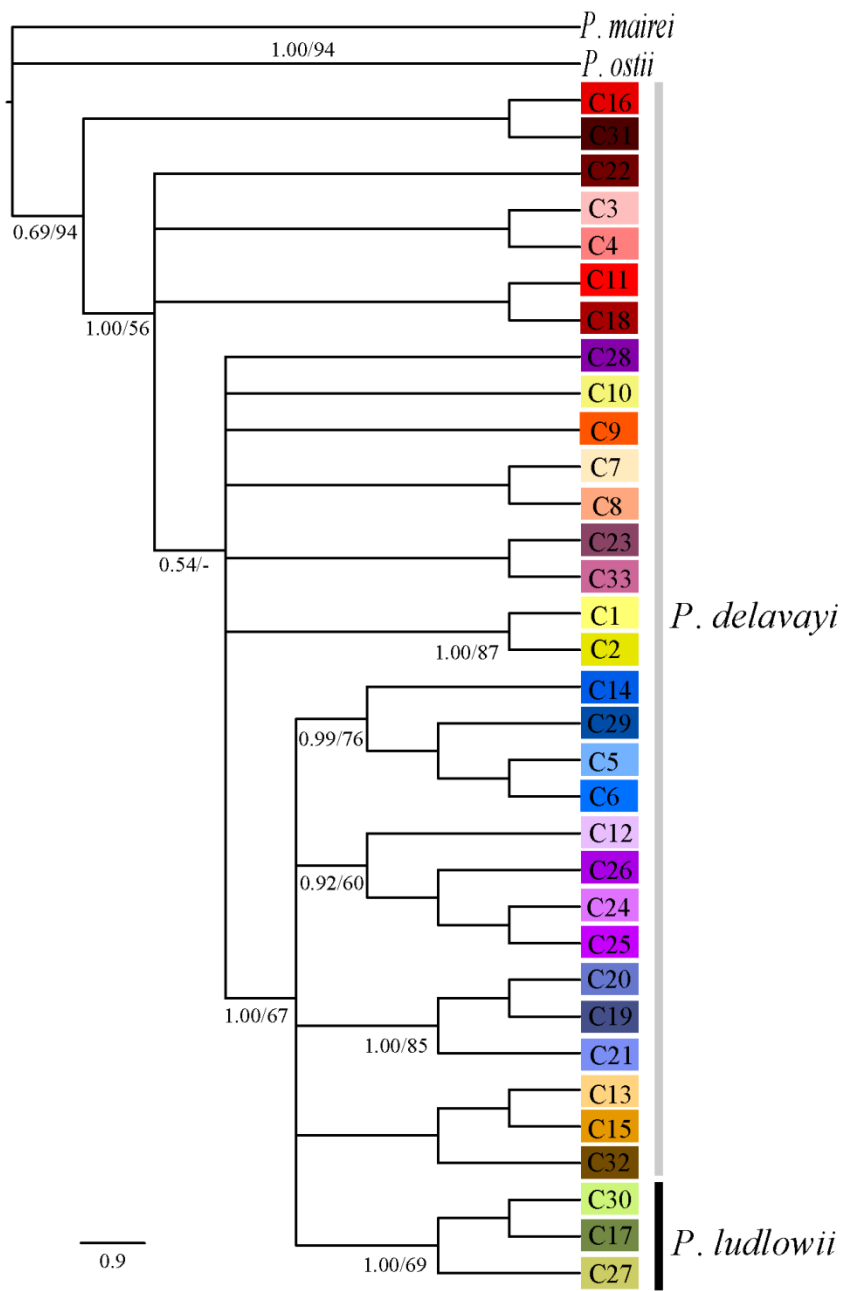

**FIGURE 3** | Phylogenetic tree derived from Bayesian inference on haplotypes recovered from three concatenated cpDNA fragments (*trnL-trnF*, *rps16-trnK*, *trnH-psbA*) of *Paeonia* subsect. *Delavayanae*. Posterior probabilities and bootstrap support of main clades are shown below the branches.

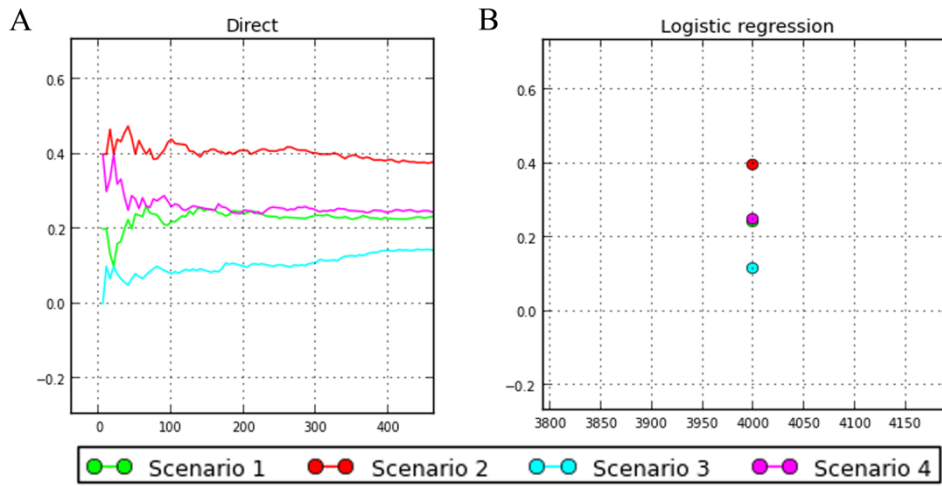

**FIGURE 4** | Posterior probabilities of four competing scenarios. (A) obtained using direct estimation of the 500 closest datasets and (B) obtained using logistic regression of 1% of closest datasets.

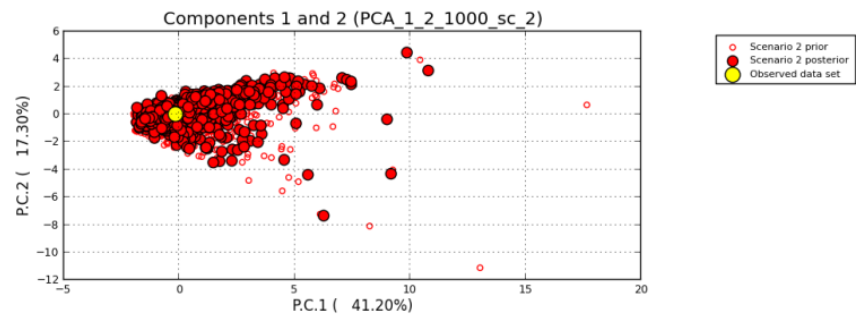

**FIGURE 5** | Principle Component Analysis (PCA) obtained by DIYABC.

## REFERENCES

- Dong, W.P., Liu, J., Yu, J., Wang, L., and Zhou, S.L. (2012). Highly variable chloroplast markers for evaluating plant phylogeny at low taxonomic levels and for DNA barcoding. *PLoS One* 7(4). doi: 10.1371/journal.pone.0035071.
- Shaw, J., Lickey, E.B., Schilling, E.E., and Small, R.L. (2007). Comparison of whole chloroplast genome sequences to choose noncoding regions for phylogenetic studies in angiosperms: the tortoise and the hare III. *Am. J. BOT.* 94(3), 275-288. doi: 10.3732/ajb.94.3.275.
- Taberlet, P., Gielly, L., Pautou, G., and Bouvet, J. (1991). Universal primers for amplification of three non-coding regions of chloroplast DNA. *Plant Mol. Biol.* 17(5), 1105-1109. doi: 10.1007/bf00037152.
- Zhou, S.L., Zou, X.H., Zhou, Z.Q., Liu, J., Xu, C., Yu, J., et al. (2014). Multiple species of wild tree peonies gave rise to the 'king of flowers', *Paeonia suffruticosa* Andrews. *Proc. R. Soc. B-Biol. Sci.* 281(1797). doi: 10.1098/rspb.2014.1687.
